# Supplementary material for: The Impact of Age, Gender, Temporality, and Geographical Region on the Prevalence of Obesity and Overweight in Saudi Arabia: Scope of Evidence
Source: MDPI journal article supplement (doi:10.3390/healthcare11081143), 2023-04-15
Supplement: s1 [file s1]

Search strategies:

| CINAHL   |                                                                                                                                                                                                                                                                                                                                                                                                                                                                                                                                                                                                                                                                                                                                                                                                                                                                                                                                                                                                                                                                                                                                                                                                                                                                                                                                                                                                                                                                                                                                                                                                                                                                                                                                                                                                                                                                                                                                                                                                                                                                                                                                                                                                                                                                                                                                                                                                                                                                                                                                              |         |
|----------|----------------------------------------------------------------------------------------------------------------------------------------------------------------------------------------------------------------------------------------------------------------------------------------------------------------------------------------------------------------------------------------------------------------------------------------------------------------------------------------------------------------------------------------------------------------------------------------------------------------------------------------------------------------------------------------------------------------------------------------------------------------------------------------------------------------------------------------------------------------------------------------------------------------------------------------------------------------------------------------------------------------------------------------------------------------------------------------------------------------------------------------------------------------------------------------------------------------------------------------------------------------------------------------------------------------------------------------------------------------------------------------------------------------------------------------------------------------------------------------------------------------------------------------------------------------------------------------------------------------------------------------------------------------------------------------------------------------------------------------------------------------------------------------------------------------------------------------------------------------------------------------------------------------------------------------------------------------------------------------------------------------------------------------------------------------------------------------------------------------------------------------------------------------------------------------------------------------------------------------------------------------------------------------------------------------------------------------------------------------------------------------------------------------------------------------------------------------------------------------------------------------------------------------------|---------|
| #        | Query                                                                                                                                                                                                                                                                                                                                                                                                                                                                                                                                                                                                                                                                                                                                                                                                                                                                                                                                                                                                                                                                                                                                                                                                                                                                                                                                                                                                                                                                                                                                                                                                                                                                                                                                                                                                                                                                                                                                                                                                                                                                                                                                                                                                                                                                                                                                                                                                                                                                                                                                        | Results |
| S7       | S3 AND S6                                                                                                                                                                                                                                                                                                                                                                                                                                                                                                                                                                                                                                                                                                                                                                                                                                                                                                                                                                                                                                                                                                                                                                                                                                                                                                                                                                                                                                                                                                                                                                                                                                                                                                                                                                                                                                                                                                                                                                                                                                                                                                                                                                                                                                                                                                                                                                                                                                                                                                                                    | 599     |
| S6       | S4 OR S5                                                                                                                                                                                                                                                                                                                                                                                                                                                                                                                                                                                                                                                                                                                                                                                                                                                                                                                                                                                                                                                                                                                                                                                                                                                                                                                                                                                                                                                                                                                                                                                                                                                                                                                                                                                                                                                                                                                                                                                                                                                                                                                                                                                                                                                                                                                                                                                                                                                                                                                                     | 327,312 |
| S5       | TI ( (Obes* OR overweight* OR (over W0 (nourish* OR nutrit* OR weight*)) OR (body W0 mass W0 index*) OR (weight W0 (reduc* OR lo#s* OR decreas* OR watch* OR control*)) OR overnutrition* OR over-nutrition* OR overnourish* OR over-nourish OR adipos* OR (waist W0 hip W0 ratio#) OR (skin W0 fold W0 thickness) OR overeat* OR (over W0 eat*) OR ((wast* OR (night W0 eating)) W0 (syndrome* OR disorder*)) OR (growth W0 falter*) OR ((eating OR feeding OR appetite OR nutrition*) W0 disorder#) OR (weight W0 length W0 percentile#) OR Hyperphagia* OR polyphagia* OR BMI OR (sagittal W0 abdominal W0 diameter#) OR (abdominal W0 (fat# OR (diameter W0 index) OR height)) OR (waist W0 (circumference# OR (to W0 (height OR hip)) OR height OR hip)) OR (lipid W0 accumalat* W0 product#) OR hypernutrition* OR hyper-nutrition*) ) OR AB ( (Obes* OR overweight* OR (over W0 (nourish* OR nutrit* OR weight*)) OR (body W0 mass W0 index*) OR (weight W0 (reduc* OR lo#s* OR decreas* OR watch* OR control*)) OR overnutrition* OR over-nutrition* OR overnourish* OR over-nourish OR adipos* OR (waist W0 hip W0 ratio#) OR (skin W0 fold W0 thickness) OR overeat* OR (over W0 eat*) OR ((wast* OR (night W0 eating)) W0 (syndrome* OR disorder*)) OR (growth W0 falter*) OR ((eating OR feeding OR appetite OR nutrition*) W0 disorder#) OR (weight W0 length W0 percentile#) OR Hyperphagia* OR polyphagia* OR BMI OR (sagittal W0 abdominal W0 diameter#) OR (abdominal W0 (fat# OR (diameter W0 index) OR height)) OR (waist W0 (circumference# OR (to W0 (height OR hip)) OR height OR hip)) OR (lipid W0 accumalat* W0 product#) OR hypernutrition* OR hyper-nutrition*) ) OR MW ( (Obes* OR overweight* OR (over W0 (nourish* OR nutrit* OR weight*)) OR (body W0 mass W0 index*) OR (weight W0 (reduc* OR lo#s* OR decreas* OR watch* OR control*)) OR overnutrition* OR over-nutrition* OR overnourish* OR over-nourish OR adipos* OR (waist W0 hip W0 ratio#) OR (skin W0 fold W0 thickness) OR overeat* OR (over W0 eat*) OR ((wast* OR (night W0 eating)) W0 (syndrome* OR disorder*)) OR (growth W0 falter*) OR ((eating OR feeding OR appetite OR nutrition*) W0 disorder#) OR (weight W0 length W0 percentile#) OR Hyperphagia* OR polyphagia* OR BMI OR (sagittal W0 abdominal W0 diameter#) OR (abdominal W0 (fat# OR (diameter W0 index) OR height)) OR (waist W0 (circumference# OR (to W0 (height OR hip)) OR height OR hip)) OR (lipid W0 accumalat* W0 product#) OR hypernutrition* OR hyper-nutrition*) ) | 306,244 |
| S4       | (MH "Obesity") OR (MH "Pediatric Obesity") OR (MH "Body Weight Changes") OR (MH "Weight Gain") OR (MH "Wasting Syndrome+") OR (MH "Overnutrition") OR (MH "Obesity, Maternal") OR (MH "Obesity, Morbid") OR (MH "Pickwickian Syndrome") OR (MH "Hyperphagia") OR (MH "Eating Disorders") OR (MH "Body Weight") OR (MH "Body Weight Changes") OR (MH "Adipose Tissue Distribution") OR (MH "Body Mass Index") OR (MH "Waist Circumference") OR (MH "Waist-Hip Ratio") OR (MH "Skinfold Thickness") OR (MH "Weight ...                                                                                                                                                                                                                                                                                                                                                                                                                                                                                                                                                                                                                                                                                                                                                                                                                                                                                                                                                                                                                                                                                                                                                                                                                                                                                                                                                                                                                                                                                                                                                                                                                                                                                                                                                                                                                                                                                                                                                                                                                         | 206,440 |
| S3       | S1 OR S2                                                                                                                                                                                                                                                                                                                                                                                                                                                                                                                                                                                                                                                                                                                                                                                                                                                                                                                                                                                                                                                                                                                                                                                                                                                                                                                                                                                                                                                                                                                                                                                                                                                                                                                                                                                                                                                                                                                                                                                                                                                                                                                                                                                                                                                                                                                                                                                                                                                                                                                                     | 7,885   |
| S2       | TI ( (saudi* OR KSA OR riyadh OR Riyadh OR Jedda* OR Jedde* OR "El Khobar" OR "Al Khobar" OR El-Khobar OR Al-Khobar OR Khobar OR Hijaz OR Dammam OR Medina* OR Mekka* OR Makka* OR Abha OR KAUST) ) OR AB ( (saudi* OR KSA OR riyadh OR Riyadh OR Jedda* OR Jedde* OR "El Khobar" OR "Al Khobar" OR El-Khobar OR Al-Khobar OR Khobar OR Hijaz OR Dammam OR Medina* OR Mekka* OR Makka* OR Abha OR KAUST) ) OR MW ( (saudi* OR KSA OR riyadh OR Riyadh OR Jedda* OR Jedde* OR "El Khobar" OR "Al Khobar" OR El-Khobar OR Al-Khobar OR Khobar OR Hijaz OR Dammam OR Medina* OR Mekka* OR Makka* OR Abha OR KAUST) )                                                                                                                                                                                                                                                                                                                                                                                                                                                                                                                                                                                                                                                                                                                                                                                                                                                                                                                                                                                                                                                                                                                                                                                                                                                                                                                                                                                                                                                                                                                                                                                                                                                                                                                                                                                                                                                                                                                            | 7,885   |
| S1       | (MH "Saudi Arabia")                                                                                                                                                                                                                                                                                                                                                                                                                                                                                                                                                                                                                                                                                                                                                                                                                                                                                                                                                                                                                                                                                                                                                                                                                                                                                                                                                                                                                                                                                                                                                                                                                                                                                                                                                                                                                                                                                                                                                                                                                                                                                                                                                                                                                                                                                                                                                                                                                                                                                                                          | 5,910   |
| Cochrane |                                                                                                                                                                                                                                                                                                                                                                                                                                                                                                                                                                                                                                                                                                                                                                                                                                                                                                                                                                                                                                                                                                                                                                                                                                                                                                                                                                                                                                                                                                                                                                                                                                                                                                                                                                                                                                                                                                                                                                                                                                                                                                                                                                                                                                                                                                                                                                                                                                                                                                                                              |         |
| ID       | Search Hits                                                                                                                                                                                                                                                                                                                                                                                                                                                                                                                                                                                                                                                                                                                                                                                                                                                                                                                                                                                                                                                                                                                                                                                                                                                                                                                                                                                                                                                                                                                                                                                                                                                                                                                                                                                                                                                                                                                                                                                                                                                                                                                                                                                                                                                                                                                                                                                                                                                                                                                                  | Results |
| #1       | MeSH descriptor: [Saudi Arabia] this term only                                                                                                                                                                                                                                                                                                                                                                                                                                                                                                                                                                                                                                                                                                                                                                                                                                                                                                                                                                                                                                                                                                                                                                                                                                                                                                                                                                                                                                                                                                                                                                                                                                                                                                                                                                                                                                                                                                                                                                                                                                                                                                                                                                                                                                                                                                                                                                                                                                                                                               | 198     |
| #2       | ((saudi* OR KSA OR riyadh OR Riyadh OR Jedda* OR Jedde* OR "El Khobar" OR "Al Khobar" OR El-Khobar OR Al-Khobar OR Khobar OR Hijaz OR Dammam OR Medina* OR Mekka* OR Makka* OR Abha OR KAUST)):ti,ab,kw                                                                                                                                                                                                                                                                                                                                                                                                                                                                                                                                                                                                                                                                                                                                                                                                                                                                                                                                                                                                                                                                                                                                                                                                                                                                                                                                                                                                                                                                                                                                                                                                                                                                                                                                                                                                                                                                                                                                                                                                                                                                                                                                                                                                                                                                                                                                      | 1259    |
| #3       | #1 OR #2                                                                                                                                                                                                                                                                                                                                                                                                                                                                                                                                                                                                                                                                                                                                                                                                                                                                                                                                                                                                                                                                                                                                                                                                                                                                                                                                                                                                                                                                                                                                                                                                                                                                                                                                                                                                                                                                                                                                                                                                                                                                                                                                                                                                                                                                                                                                                                                                                                                                                                                                     | 1259    |
| #4       | MeSH descriptor: [Obesity] this term only                                                                                                                                                                                                                                                                                                                                                                                                                                                                                                                                                                                                                                                                                                                                                                                                                                                                                                                                                                                                                                                                                                                                                                                                                                                                                                                                                                                                                                                                                                                                                                                                                                                                                                                                                                                                                                                                                                                                                                                                                                                                                                                                                                                                                                                                                                                                                                                                                                                                                                    | 12580   |
| #5       | MeSH descriptor: [Pediatric Obesity] this term only                                                                                                                                                                                                                                                                                                                                                                                                                                                                                                                                                                                                                                                                                                                                                                                                                                                                                                                                                                                                                                                                                                                                                                                                                                                                                                                                                                                                                                                                                                                                                                                                                                                                                                                                                                                                                                                                                                                                                                                                                                                                                                                                                                                                                                                                                                                                                                                                                                                                                          | 1438    |

|        |                                                                                                                                                                                                                                                                                                                                                                                                                                                                                                                                                                                                                                                                                                                                                                                                                                                                                                                                              |         |
|--------|----------------------------------------------------------------------------------------------------------------------------------------------------------------------------------------------------------------------------------------------------------------------------------------------------------------------------------------------------------------------------------------------------------------------------------------------------------------------------------------------------------------------------------------------------------------------------------------------------------------------------------------------------------------------------------------------------------------------------------------------------------------------------------------------------------------------------------------------------------------------------------------------------------------------------------------------|---------|
|        |                                                                                                                                                                                                                                                                                                                                                                                                                                                                                                                                                                                                                                                                                                                                                                                                                                                                                                                                              |         |
| #6     | MeSH descriptor: [Hyperphagia] explode all trees                                                                                                                                                                                                                                                                                                                                                                                                                                                                                                                                                                                                                                                                                                                                                                                                                                                                                             | 738     |
| #7     | MeSH descriptor: [Weight Gain] this term only                                                                                                                                                                                                                                                                                                                                                                                                                                                                                                                                                                                                                                                                                                                                                                                                                                                                                                | 2678    |
| #8     | MeSH descriptor: [Body Weight] this term only                                                                                                                                                                                                                                                                                                                                                                                                                                                                                                                                                                                                                                                                                                                                                                                                                                                                                                | 8780    |
| #9     | MeSH descriptor: [Overweight] this term only                                                                                                                                                                                                                                                                                                                                                                                                                                                                                                                                                                                                                                                                                                                                                                                                                                                                                                 | 5667    |
| #10    | MeSH descriptor: [Body Fat Distribution] explode all trees                                                                                                                                                                                                                                                                                                                                                                                                                                                                                                                                                                                                                                                                                                                                                                                                                                                                                   | 1022    |
| #11    | MeSH descriptor: [Body Mass Index] this term only                                                                                                                                                                                                                                                                                                                                                                                                                                                                                                                                                                                                                                                                                                                                                                                                                                                                                            | 10782   |
| #12    | MeSH descriptor: [Sagittal Abdominal Diameter] this term only                                                                                                                                                                                                                                                                                                                                                                                                                                                                                                                                                                                                                                                                                                                                                                                                                                                                                | 0       |
| #13    | MeSH descriptor: [Waist Circumference] explode all trees                                                                                                                                                                                                                                                                                                                                                                                                                                                                                                                                                                                                                                                                                                                                                                                                                                                                                     | 1128    |
| #14    | MeSH descriptor: [Waist-Height Ratio] this term only                                                                                                                                                                                                                                                                                                                                                                                                                                                                                                                                                                                                                                                                                                                                                                                                                                                                                         | 10      |
| #15    | MeSH descriptor: [Skinfold Thickness] this term only                                                                                                                                                                                                                                                                                                                                                                                                                                                                                                                                                                                                                                                                                                                                                                                                                                                                                         | 324     |
| #16    | MeSH descriptor: [Waist-Hip Ratio] this term only                                                                                                                                                                                                                                                                                                                                                                                                                                                                                                                                                                                                                                                                                                                                                                                                                                                                                            | 274     |
| #17    | MeSH descriptor: [Weight Reduction Programs] this term only                                                                                                                                                                                                                                                                                                                                                                                                                                                                                                                                                                                                                                                                                                                                                                                                                                                                                  | 856     |
| #18    | MeSH descriptor: [Body Fat Distribution] explode all trees                                                                                                                                                                                                                                                                                                                                                                                                                                                                                                                                                                                                                                                                                                                                                                                                                                                                                   | 1022    |
| #19    | MeSH descriptor: [Nutrition Disorders] this term only                                                                                                                                                                                                                                                                                                                                                                                                                                                                                                                                                                                                                                                                                                                                                                                                                                                                                        | 498     |
| #20    | MeSH descriptor: [Child Nutrition Disorders] this term only                                                                                                                                                                                                                                                                                                                                                                                                                                                                                                                                                                                                                                                                                                                                                                                                                                                                                  | 256     |
| #21    | MeSH descriptor: [Infant Nutrition Disorders] this term only                                                                                                                                                                                                                                                                                                                                                                                                                                                                                                                                                                                                                                                                                                                                                                                                                                                                                 | 143     |
| #22    | MeSH descriptor: [Feeding and Eating Disorders] this term only                                                                                                                                                                                                                                                                                                                                                                                                                                                                                                                                                                                                                                                                                                                                                                                                                                                                               | 854     |
| #23    | MeSH descriptor: [Night Eating Syndrome] this term only                                                                                                                                                                                                                                                                                                                                                                                                                                                                                                                                                                                                                                                                                                                                                                                                                                                                                      | 0       |
| #24    | ((Obes* OR overweight* OR (over NEXT/1 (nourish* OR nutrit* OR weight*)) OR (body NEXT/1 mass NEXT/1 index*) OR (weight NEXT/1 (reduc* OR lo?s* OR decreas* OR watch* OR control*)) OR overnutrition* OR over-nutrition* OR overnourish* OR over-nourish OR adipos* OR (waist NEXT/1 hip NEXT/1 ratio?) OR (skin NEXT/1 fold NEXT/1 thickness) OR overeat* OR (over NEXT/1 eat*) OR ((wast* OR (night NEXT/1 eating)) NEXT/1 (syndrome* OR disorder*)) OR (growth NEXT/1 falter*) OR ((eating OR feeding OR appetite OR nutrition*) NEXT/1 disorder?) OR (weight NEXT/1 length NEXT/1 percentile?) OR Hyperphagia* OR polyphagia* OR BMI OR (sagittal NEXT/1 abdominal NEXT/1 diameter?) OR (abdominal NEXT/1 (fat? OR (diameter NEXT/1 index) OR height)) OR (waist NEXT/1 (circumference? OR (to NEXT/1 (height OR hip)) OR height OR hip)) OR (lipid NEXT/1 accumulat* NEXT/1 product?) OR hypernutrition* OR hyper-nutrition*)):ti,ab,kw | 115768  |
| #25    | {OR #4-#23}                                                                                                                                                                                                                                                                                                                                                                                                                                                                                                                                                                                                                                                                                                                                                                                                                                                                                                                                  | 32980   |
| #26    | #3 AND #25                                                                                                                                                                                                                                                                                                                                                                                                                                                                                                                                                                                                                                                                                                                                                                                                                                                                                                                                   | 22      |
| Embase |                                                                                                                                                                                                                                                                                                                                                                                                                                                                                                                                                                                                                                                                                                                                                                                                                                                                                                                                              |         |
| #13    | #1 AND #12                                                                                                                                                                                                                                                                                                                                                                                                                                                                                                                                                                                                                                                                                                                                                                                                                                                                                                                                   | 3820    |
| #12    | #2 OR #3 OR #4 OR #5 OR #6 OR #7 OR #8 OR #9 OR #10 OR #11                                                                                                                                                                                                                                                                                                                                                                                                                                                                                                                                                                                                                                                                                                                                                                                                                                                                                   | 1841413 |
| #11    | ((waist NEXT/1 (circumference\$ OR 'to height' OR 'to hip' OR height OR hip)):ti,ab,kw) OR ((lipid NEXT/1 accumulat* NEXT/1 product\$):ti,ab,kw) OR hypernutrition*:ti,ab,kw OR 'hyper nutrition*':ti,ab,kw                                                                                                                                                                                                                                                                                                                                                                                                                                                                                                                                                                                                                                                                                                                                  | 62323   |
| #10    | ((sagittal NEXT/1 abdominal NEXT/1 diameter\$):ti,ab,kw) OR ((abdominal NEXT/1 (fat\$ OR 'diameter index' OR height)):ti,ab,kw)                                                                                                                                                                                                                                                                                                                                                                                                                                                                                                                                                                                                                                                                                                                                                                                                              | 9755    |
| #9     | ((weight NEXT/1 length NEXT/1 percentile\$):ti,ab,kw) OR hyperphagia*:ti,ab,kw OR polyphagia*:ti,ab,kw OR bmi:ti,ab,kw                                                                                                                                                                                                                                                                                                                                                                                                                                                                                                                                                                                                                                                                                                                                                                                                                       | 364721  |
| #8     | ((growth NEXT/1 falter*):ti,ab,kw) OR (((eating OR feeding OR appetite OR nutrition*) NEXT/1 disorder\$):ti,ab,kw)                                                                                                                                                                                                                                                                                                                                                                                                                                                                                                                                                                                                                                                                                                                                                                                                                           | 34379   |
| #7     | ((wast* OR 'night eating') NEXT/1 (syndrome* OR disorder*)):ti,ab,kw                                                                                                                                                                                                                                                                                                                                                                                                                                                                                                                                                                                                                                                                                                                                                                                                                                                                         | 3340    |
| #6     | 'skin fold thickness':ti,ab,kw OR overeat*:ti,ab,kw OR ((over NEXT/1 eat*):ti,ab,kw)                                                                                                                                                                                                                                                                                                                                                                                                                                                                                                                                                                                                                                                                                                                                                                                                                                                         | 5914    |
| #5     | overnutrition*:ti,ab,kw OR 'over nutrition*':ti,ab,kw OR overnourish*:ti,ab,kw OR 'over nourish':ti,ab,kw OR adipos*:ti,ab,kw OR ((waist NEXT/1 hip NEXT/1 ratio\$):ti,ab,kw)                                                                                                                                                                                                                                                                                                                                                                                                                                                                                                                                                                                                                                                                                                                                                                | 173997  |
| #4     | ((body NEXT/1 mass NEXT/1 index*):ti,ab,kw) OR ((weight NEXT/1 (reduc* OR lo?s* OR decreas* OR watch* OR control*)):ti,ab,kw)                                                                                                                                                                                                                                                                                                                                                                                                                                                                                                                                                                                                                                                                                                                                                                                                                | 470462  |
| #3     | obes*:ti,ab,kw OR overweight*:ti,ab,kw OR ((over NEXT/1 (nourish* OR nutrit* OR weight*)):ti,ab,kw)                                                                                                                                                                                                                                                                                                                                                                                                                                                                                                                                                                                                                                                                                                                                                                                                                                          | 545579  |
| #2     | obesity'/exp OR 'hyperphagia'/de OR 'body weight gain'/exp OR 'body weight'/exp OR 'body mass'/de OR 'sagittal abdominal diameter'/de OR 'waist circumference'/de OR 'waist to height ratio'/de OR 'skinfold thickness'/exp OR 'waist hip ratio'/de OR 'weight loss program'/de OR                                                                                                                                                                                                                                                                                                                                                                                                                                                                                                                                                                                                                                                           | 1567779 |

|                                                                                                                                        |                                                                                                                                                                                                                                                                                                                                                                                                                                                                                                                                                                                                                                                                                                                                                                                                                                                                                                                                                                                                                                                                                                                                                                                                                                                                                                                                                                                                                                                                                                                                                                                                                                                                                                                |          |
|----------------------------------------------------------------------------------------------------------------------------------------|----------------------------------------------------------------------------------------------------------------------------------------------------------------------------------------------------------------------------------------------------------------------------------------------------------------------------------------------------------------------------------------------------------------------------------------------------------------------------------------------------------------------------------------------------------------------------------------------------------------------------------------------------------------------------------------------------------------------------------------------------------------------------------------------------------------------------------------------------------------------------------------------------------------------------------------------------------------------------------------------------------------------------------------------------------------------------------------------------------------------------------------------------------------------------------------------------------------------------------------------------------------------------------------------------------------------------------------------------------------------------------------------------------------------------------------------------------------------------------------------------------------------------------------------------------------------------------------------------------------------------------------------------------------------------------------------------------------|----------|
|                                                                                                                                        | 'body fat distribution'/de OR 'nutritional disorder'/de OR 'eating disorder'/de OR 'binge eating disorder'/exp OR 'obesity hypoventilation syndrome'/de                                                                                                                                                                                                                                                                                                                                                                                                                                                                                                                                                                                                                                                                                                                                                                                                                                                                                                                                                                                                                                                                                                                                                                                                                                                                                                                                                                                                                                                                                                                                                        |          |
| #1                                                                                                                                     | 'saudi'/de OR 'saudi arabia'/de OR saudi*:ti,ab,kw OR ksa:ti,ab,kw OR riyadh:ti,ab,kw OR riyad:ti,ab,kw OR jedda*:ti,ab,kw OR jedde*:ti,ab,kw OR 'el-khoba':ti,ab,kw OR 'al-khobar':ti,ab,kw OR 'el khobar':ti,ab,kw OR 'al khobar':ti,ab,kw OR khobar:ti,ab,kw OR hijaz:ti,ab,kw OR dammam:ti,ab,kw OR medina*:ti,ab,kw OR mekka*:ti,ab,kw OR makka*:ti,ab,kw OR abha:ti,ab,kw OR kaust:ti,ab,kw                                                                                                                                                                                                                                                                                                                                                                                                                                                                                                                                                                                                                                                                                                                                                                                                                                                                                                                                                                                                                                                                                                                                                                                                                                                                                                              | 37447    |
| Ovid MEDLINE(R) and Epub Ahead of Print, In-Process, In-Data-Review & Other Non-Indexed Citations and Daily <1946 to January 31, 2022> |                                                                                                                                                                                                                                                                                                                                                                                                                                                                                                                                                                                                                                                                                                                                                                                                                                                                                                                                                                                                                                                                                                                                                                                                                                                                                                                                                                                                                                                                                                                                                                                                                                                                                                                |          |
| 1                                                                                                                                      | Saudi Arabia/                                                                                                                                                                                                                                                                                                                                                                                                                                                                                                                                                                                                                                                                                                                                                                                                                                                                                                                                                                                                                                                                                                                                                                                                                                                                                                                                                                                                                                                                                                                                                                                                                                                                                                  | (15550)  |
| 2                                                                                                                                      | (saudi* or KSA or riyadh or Riyadh or Jedda* or Jedde* or "El Khobar" or "Al Khobar" or El-Khobar or Al-Khobar or Khobar or Hijaz or Dammam or Medina* or Mekka* or Makka* or Abha or KAUST).mp.                                                                                                                                                                                                                                                                                                                                                                                                                                                                                                                                                                                                                                                                                                                                                                                                                                                                                                                                                                                                                                                                                                                                                                                                                                                                                                                                                                                                                                                                                                               | (30054)  |
| 3                                                                                                                                      | 1 or 2                                                                                                                                                                                                                                                                                                                                                                                                                                                                                                                                                                                                                                                                                                                                                                                                                                                                                                                                                                                                                                                                                                                                                                                                                                                                                                                                                                                                                                                                                                                                                                                                                                                                                                         | (30054)  |
| 4                                                                                                                                      | Obesity/ or Pediatric Obesity/ or exp Hyperphagia/ or Weight Gain/ or Body Weight/ or Overweight/ or exp body fat distribution/ or body mass index/ or sagittal abdominal diameter/ or exp waist circumference/ or waist-height ratio/ or skinfold thickness/ or waist-hip ratio/ or Weight Reduction Programs/ or exp body fat distribution/ or nutrition disorders/ or child nutrition disorders/ or infant nutrition disorders/ or "feeding and eating disorders"/ or night eating syndrome/                                                                                                                                                                                                                                                                                                                                                                                                                                                                                                                                                                                                                                                                                                                                                                                                                                                                                                                                                                                                                                                                                                                                                                                                                | (539272) |
| 5                                                                                                                                      | (Obes* or overweight* or (over adj (nourish* or nutrit* or weight*)) or (body adj mass adj index*) or (weight adj (reduc* or lo?s* or decreas* or watch* or control*)) or overnutrition* or over-nutrition* or overnourish* or over-nourish or adipos* or (waist adj hip adj ratio?) or (skin adj fold adj thickness) or overeat* or (over adj eat*) or ((wast* or (night adj eating)) adj (syndrome* or disorder*)) or (growth adj falter*) or ((eating or feeding or appetite or nutrition*) adj disorder?) or (weight adj length adj percentile?) or Hyperphagia* or polyphagia* or BMI or (sagittal adj abdominal adj diameter?) or (abdominal adj (fat? or (diameter adj index) or height)) or (waist adj (circumference? or (to adj (height or hip)) or height or hip)) or (lipid adj accumulat* adj product?) or hypernutrition* or hyper-nutrition*).mp.                                                                                                                                                                                                                                                                                                                                                                                                                                                                                                                                                                                                                                                                                                                                                                                                                                               | (840722) |
| 6                                                                                                                                      | 4 or 5                                                                                                                                                                                                                                                                                                                                                                                                                                                                                                                                                                                                                                                                                                                                                                                                                                                                                                                                                                                                                                                                                                                                                                                                                                                                                                                                                                                                                                                                                                                                                                                                                                                                                                         | (995631) |
| 7                                                                                                                                      | 3 and 6                                                                                                                                                                                                                                                                                                                                                                                                                                                                                                                                                                                                                                                                                                                                                                                                                                                                                                                                                                                                                                                                                                                                                                                                                                                                                                                                                                                                                                                                                                                                                                                                                                                                                                        | (2102)   |
| PSYCIINFO                                                                                                                              |                                                                                                                                                                                                                                                                                                                                                                                                                                                                                                                                                                                                                                                                                                                                                                                                                                                                                                                                                                                                                                                                                                                                                                                                                                                                                                                                                                                                                                                                                                                                                                                                                                                                                                                |          |
| S5                                                                                                                                     | S3 AND S4                                                                                                                                                                                                                                                                                                                                                                                                                                                                                                                                                                                                                                                                                                                                                                                                                                                                                                                                                                                                                                                                                                                                                                                                                                                                                                                                                                                                                                                                                                                                                                                                                                                                                                      | 76       |
| S4                                                                                                                                     | TI ( (saudi* OR KSA OR riyadh OR Riyadh OR Jedda* OR Jedde* OR "El Khobar" OR "Al Khobar" OR El-Khobar OR Al-Khobar OR Khobar OR Hijaz OR Dammam OR Medina* OR Mekka* OR Makka* OR Abha OR KAUST) ) OR AB ( (saudi* OR KSA OR riyadh OR Riyadh OR Jedda* OR Jedde* OR "El Khobar" OR "Al Khobar" OR El-Khobar OR Al-Khobar OR Khobar OR Hijaz OR Dammam OR Medina* OR Mekka* OR Makka* OR Abha OR KAUST) ) OR MW ( (saudi* OR KSA OR riyadh OR Riyadh OR Jedda* OR Jedde* OR "El Khobar" OR "Al Khobar" OR El-Khobar OR Al-Khobar OR Khobar OR Hijaz OR Dammam OR Medina* OR Mekka* OR Makka* OR Abha OR KAUST) )                                                                                                                                                                                                                                                                                                                                                                                                                                                                                                                                                                                                                                                                                                                                                                                                                                                                                                                                                                                                                                                                                              | 2,996    |
| S3                                                                                                                                     | S1 OR S2                                                                                                                                                                                                                                                                                                                                                                                                                                                                                                                                                                                                                                                                                                                                                                                                                                                                                                                                                                                                                                                                                                                                                                                                                                                                                                                                                                                                                                                                                                                                                                                                                                                                                                       | 98,401   |
| S2                                                                                                                                     | TI ( (Obes* OR overweight* OR (over W0 (nourish* OR nutrit* OR weight*)) OR (body W0 mass W0 index*) OR (weight W0 (reduc* OR lo#s* OR decreas* OR watch* OR control*)) OR overnutrition* OR over-nutrition* OR overnourish* OR over-nourish OR adipos* OR (waist W0 hip W0 ratio#) OR (skin W0 fold W0 thickness) OR overeat* OR (over W0 eat*) OR ((wast* OR (night W0 eating)) W0 (syndrome* OR disorder*)) OR (growth W0 falter*) OR ((eating OR feeding OR appetite OR nutrition*) W0 disorder#) OR (weight W0 length W0 percentile#) OR Hyperphagia* OR polyphagia* OR BMI OR (sagittal W0 abdominal W0 diameter#) OR (abdominal W0 (fat# OR (diameter W0 index) OR height)) OR (waist W0 (circumference# OR (to W0 (height OR hip)) OR height OR hip)) OR (lipid W0 accumulat* W0 product#) OR hypernutrition* OR hyper-nutrition*) ) OR AB ( (Obes* OR overweight* OR (over W0 (nourish* OR nutrit* OR weight*)) OR (body W0 mass W0 index*) OR (weight W0 (reduc* OR lo#s* OR decreas* OR watch* OR control*)) OR overnutrition* OR over-nutrition* OR overnourish* OR over-nourish OR adipos* OR (waist W0 hip W0 ratio#) OR (skin W0 fold W0 thickness) OR overeat* OR (over W0 eat*) OR ((wast* OR (night W0 eating)) W0 (syndrome* OR disorder*)) OR (growth W0 falter*) OR ((eating OR feeding OR appetite OR nutrition*) W0 disorder#) OR (weight W0 length W0 percentile#) OR Hyperphagia* OR polyphagia* OR BMI OR (sagittal W0 abdominal W0 diameter#) OR (abdominal W0 (fat# OR (diameter W0 index) OR height)) OR (waist W0 (circumference# OR (to W0 (height OR hip)) OR height OR hip)) OR (lipid W0 accumulat* W0 product#) OR hypernutrition* OR hyper-nutrition*) ) OR MW ( (Obes* OR | 95,621   |

|        |                                                                                                                                                                                                                                                                                                                                                                                                                                                                                                                                                                                                                                                                                                                                                                                                                                                                                                                                                                                                                                                                                                                                                                                                         |        |
|--------|---------------------------------------------------------------------------------------------------------------------------------------------------------------------------------------------------------------------------------------------------------------------------------------------------------------------------------------------------------------------------------------------------------------------------------------------------------------------------------------------------------------------------------------------------------------------------------------------------------------------------------------------------------------------------------------------------------------------------------------------------------------------------------------------------------------------------------------------------------------------------------------------------------------------------------------------------------------------------------------------------------------------------------------------------------------------------------------------------------------------------------------------------------------------------------------------------------|--------|
|        | overweight* OR (over W0 (nourish* OR nutrit* OR weight*)) OR (body W0 mass W0 index*) OR (weight W0 (reduc* OR lo#s* OR decreas* OR watch* OR control*)) OR overnutrition* OR over-nutrition* OR overnourish* OR over-nourish OR adipos* OR (waist W0 hip W0 ratio#) OR (skin W0 fold W0 thickness) OR overeat* OR (over W0 eat*) OR ((wast* OR (night W0 eating)) W0 (syndrome* OR disorder*)) OR (growth W0 falter*) OR ((eating OR feeding OR appetite OR nutrition*) W0 disorder#) OR (weight W0 length W0 percentile#) OR Hyperphagia* OR polyphagia* OR BMI OR (sagittal W0 abdominal W0 diameter#) OR (abdominal W0 (fat# OR (diameter W0 index) OR height)) OR (waist W0 (circumference# OR (to W0 (height OR hip)) OR height OR hip)) OR (lipid W0 accumulat* W0 product#) OR hypernutrition* OR hyper-nutrition*) )                                                                                                                                                                                                                                                                                                                                                                           |        |
| S1     | (((((DE "Obesity" OR DE "Overweight" OR DE "Obesity (Attitudes Toward)") OR (DE "Weight Gain")) OR (DE "Hyperphagia")) OR (DE "Eating Disorders")) OR (DE "Body Mass Index")) OR (DE "Weightlessness")) OR (DE "Feeding Disorders")) AND (DE "Eating Behavior" OR DE "Eating Disorders"))                                                                                                                                                                                                                                                                                                                                                                                                                                                                                                                                                                                                                                                                                                                                                                                                                                                                                                               | 21,454 |
| Scopus |                                                                                                                                                                                                                                                                                                                                                                                                                                                                                                                                                                                                                                                                                                                                                                                                                                                                                                                                                                                                                                                                                                                                                                                                         |        |
|        | ( TITLE-ABS-KEY ( saudi* OR ksa OR riyadh OR riyad OR jedda* OR jedde* OR "El Khobar" OR "Al Khobar" OR el-khobar OR al-khobar OR khobar OR hijaz OR dammam OR medina* OR mekka* OR makka* OR abha OR kaust ) ) AND ( TITLE-ABS-KEY (( obes* OR overweight* OR ( over PRE/O ( nourish* OR nutrit* OR weight* ) ) OR ( body PRE/O mass PRE/O index* ) OR ( weight PRE/O ( reduc* OR lo*s* OR decreas* OR watch* OR control* ) ) OR overnutrition* OR over-nutrition* OR overnourish* OR over-nourish OR adipos* OR ( waist PRE/O hip PRE/O ratio* ) OR ( skin PRE/O fold PRE/O thickness ) OR overeat* OR ( over PRE/O eat* ) OR ( ( wast* OR ( night PRE/O eating ) ) PRE/O ( syndrome* OR disorder* ) ) OR ( growth PRE/O falter* ) OR ( ( eating OR feeding OR appetite OR nutrition* ) PRE/O disorder* ) OR ( weight PRE/O length PRE/O percentile* ) OR hyperphagia* OR polyphagia* OR bmi OR ( sagittal PRE/O abdominal PRE/O diameter* ) OR ( abdominal PRE/O ( fat* OR ( diameter PRE/O index ) OR height ) ) OR ( waist PRE/O ( circumference* OR ( to PRE/O ( height OR hip ) ) OR height OR hip ) ) OR ( lipid PRE/O accumulat* PRE/O product* ) OR hypernutrition* OR hyper-nutrition* ) ) ) |        |
